# Supplementary material for: Factors influencing presentation delay among cancer patients: a cross-sectional study in Malaysia
Source: Springer Nature journal article supplement (doi:10.1186/s12889-024-18643-2), 2024-05-08
Supplement: MOESM1 [file 27069346]

SECTION 1

**SUBSECTION 1: ABOUT YOU**

**Q1. What is your ethnicity?**

- |                                                           |                                     |                                                                                   |
|-----------------------------------------------------------|-------------------------------------|-----------------------------------------------------------------------------------|
| <input type="checkbox"/> 1 Malay                          | <input type="checkbox"/> 5 Serani   | <input type="checkbox"/> 19 Other Bumiputera Of Sabah,<br>please specify: _____   |
| <input type="checkbox"/> 2 Chinese                        | <input type="checkbox"/> 6 Iban     | <input type="checkbox"/> 29 Other Bumiputera Of Sarawak,<br>please specify: _____ |
| <input type="checkbox"/> 3 Indian                         | <input type="checkbox"/> 7 Kadazan  | <input type="checkbox"/> 99 Others,<br>please specify: _____                      |
| <input type="checkbox"/> 4 Orang Asli Peninsular Malaysia | <input type="checkbox"/> 8 Dusun    |                                                                                   |
|                                                           | <input type="checkbox"/> 9 Bidayuh  |                                                                                   |
|                                                           | <input type="checkbox"/> 10 Melanau |                                                                                   |

**Q2. What is your marital status?**

- |                                            |                                                           |
|--------------------------------------------|-----------------------------------------------------------|
| <input type="checkbox"/> 1 Single          | <input type="checkbox"/> 5 Divorced                       |
| <input type="checkbox"/> 2 Married         | <input type="checkbox"/> 6 Cohabiting                     |
| <input type="checkbox"/> 3 Separated       | <input type="checkbox"/> 99 Others, please specify: _____ |
| <input type="checkbox"/> 4 Widow / Widower |                                                           |

**Q3. Do you have any children?**

- 0 No
- 1 Yes, **how many children do you have?** \_\_\_\_\_
- How old is your youngest child?** \_\_\_\_\_
- How old is your oldest child?** \_\_\_\_\_

**Q4. Who do you live with in your current residence?**

- |                                           |                                                           |
|-------------------------------------------|-----------------------------------------------------------|
| <input type="checkbox"/> 1 Living Alone   | <input type="checkbox"/> 3 Nursing Home                   |
| <input type="checkbox"/> 2 Partner/Family | <input type="checkbox"/> 99 Others, please specify: _____ |

**Q5. What is your highest education level?**

- |                                                                       |                                                                     |
|-----------------------------------------------------------------------|---------------------------------------------------------------------|
| <input type="checkbox"/> 0 No formal education / Never been to school | <input type="checkbox"/> 5 Completed Form 6 / Certificate / Diploma |
| <input type="checkbox"/> 1 Did not complete primary school            | <input type="checkbox"/> 6 Completed Bachelor's Degree              |
| <input type="checkbox"/> 2 Completed Standard 6                       | <input type="checkbox"/> 7 Completed Masters                        |
| <input type="checkbox"/> 3 Completed Form 3                           | <input type="checkbox"/> 8 Completed Doctoral Qualification (PhD)   |
| <input type="checkbox"/> 4 Completed Form 5                           | <input type="checkbox"/> 99 Others, please specify: _____           |

SECTION 1

**SUBSECTION 1: ABOUT YOU (CONTINUED)**

**Q6. What was your job before being diagnosed with cancer?**

- <sub>1</sub> Employed, please specify your job: \_\_\_\_\_
- <sub>2</sub> Retiree
- <sub>3</sub> Student
- <sub>0</sub> Unemployed

**Q7. Prior to diagnosis of cancer, how much was your gross monthly personal income (salary / pension)?**

- <sub>1</sub> RM0 – RM999      <sub>2</sub> RM1000 – RM3000      <sub>3</sub> RM3001 – RM6000      <sub>4</sub> RM6001 and above

**Q8. Prior to diagnosis of cancer, what was your monthly household income?**

- <sub>1</sub> RM0 – RM999      <sub>2</sub> RM1000 – RM3000      <sub>3</sub> RM3001 – RM6000      <sub>4</sub> RM6001 and above

**Q9. Have you ever been diagnosed with the following diseases?**

*Please TICK (✓) all the relevant boxes.*

- |                                                                          |                                                                           |
|--------------------------------------------------------------------------|---------------------------------------------------------------------------|
| <input type="checkbox"/> <sub>1</sub> High Blood Pressure                | <input type="checkbox"/> <sub>5</sub> Heart Related Diseases              |
| <input type="checkbox"/> <sub>2</sub> Diabetes                           | <input type="checkbox"/> <sub>6</sub> Arthritis / Muscle or Bone Diseases |
| <input type="checkbox"/> <sub>3</sub> Stroke Related Diseases            | <input type="checkbox"/> <sub>7</sub> Longstanding Physical Disability    |
| <input type="checkbox"/> <sub>4</sub> Breathing or Lung Related Diseases | <input type="checkbox"/> <sub>8</sub> Cancer, please specify: _____       |
| <input type="checkbox"/> <sub>99</sub> Others, please specify: _____     |                                                                           |

**Q10. Does any of your family members have history of cancer?**

- <sub>0</sub> No
- <sub>1</sub> Yes, **how are they related to you?** \_\_\_\_\_
- What type of cancer do they have?** \_\_\_\_\_

**Q11. Where would you go when you are sick?**

*Please TICK (✓) all the relevant boxes.*

- |                                                                |                                                                              |
|----------------------------------------------------------------|------------------------------------------------------------------------------|
| <input type="checkbox"/> <sub>1</sub> Private Clinic           | <input type="checkbox"/> <sub>5</sub> University Clinic                      |
| <input type="checkbox"/> <sub>2</sub> Private Hospital         | <input type="checkbox"/> <sub>6</sub> University Hospital                    |
| <input type="checkbox"/> <sub>3</sub> Government Health Clinic | <input type="checkbox"/> <sub>7</sub> Traditional and Complementary Medicine |
| <input type="checkbox"/> <sub>4</sub> Government Hospital      |                                                                              |

## SECTION 1

| <b>SUBSECTION 2: CONSULTATIONS</b>                                                                                                                                                                 |                                          |                             |                            |                          |                                       |
|----------------------------------------------------------------------------------------------------------------------------------------------------------------------------------------------------|------------------------------------------|-----------------------------|----------------------------|--------------------------|---------------------------------------|
| <b>Q12. Which of the following <u>might put you off</u> from going to any doctors treating your cancer?</b><br><i>Please TICK (✓) the most relevant options provided for following statements.</i> | <b>Strongly<br/>Disagree<sub>1</sub></b> | <b>Disagree<sub>2</sub></b> | <b>Neutral<sub>3</sub></b> | <b>Agree<sub>4</sub></b> | <b>Strongly<br/>Agree<sub>5</sub></b> |
| a. It is embarrassing to talk to a doctor about my symptoms.                                                                                                                                       | <input type="checkbox"/>                 | <input type="checkbox"/>    | <input type="checkbox"/>   | <input type="checkbox"/> | <input type="checkbox"/>              |
| b. Not confident talking about my symptom(s) with the doctor.                                                                                                                                      | <input type="checkbox"/>                 | <input type="checkbox"/>    | <input type="checkbox"/>   | <input type="checkbox"/> | <input type="checkbox"/>              |
| c. The waiting time during doctor visits is too long.                                                                                                                                              | <input type="checkbox"/>                 | <input type="checkbox"/>    | <input type="checkbox"/>   | <input type="checkbox"/> | <input type="checkbox"/>              |
| d. Worried about wasting the doctor's time.                                                                                                                                                        | <input type="checkbox"/>                 | <input type="checkbox"/>    | <input type="checkbox"/>   | <input type="checkbox"/> | <input type="checkbox"/>              |
| e. Worried to be seen as somebody who makes a fuss.                                                                                                                                                | <input type="checkbox"/>                 | <input type="checkbox"/>    | <input type="checkbox"/>   | <input type="checkbox"/> | <input type="checkbox"/>              |
| f. Worried if the doctor finds out something wrong with me.                                                                                                                                        | <input type="checkbox"/>                 | <input type="checkbox"/>    | <input type="checkbox"/>   | <input type="checkbox"/> | <input type="checkbox"/>              |
| g. Worried about what medical tests the doctor might want to do.                                                                                                                                   | <input type="checkbox"/>                 | <input type="checkbox"/>    | <input type="checkbox"/>   | <input type="checkbox"/> | <input type="checkbox"/>              |
| h. Worried the doctor would not take my symptom(s) seriously.                                                                                                                                      | <input type="checkbox"/>                 | <input type="checkbox"/>    | <input type="checkbox"/>   | <input type="checkbox"/> | <input type="checkbox"/>              |
| i. The doctor does not understand my language or culture.                                                                                                                                          | <input type="checkbox"/>                 | <input type="checkbox"/>    | <input type="checkbox"/>   | <input type="checkbox"/> | <input type="checkbox"/>              |
| j. Bad experience with doctors' in the past.                                                                                                                                                       | <input type="checkbox"/>                 | <input type="checkbox"/>    | <input type="checkbox"/>   | <input type="checkbox"/> | <input type="checkbox"/>              |
| k. The doctor is unfriendly.                                                                                                                                                                       | <input type="checkbox"/>                 | <input type="checkbox"/>    | <input type="checkbox"/>   | <input type="checkbox"/> | <input type="checkbox"/>              |
| l. Prefer not to be examined by a doctor of the opposite sex.                                                                                                                                      | <input type="checkbox"/>                 | <input type="checkbox"/>    | <input type="checkbox"/>   | <input type="checkbox"/> | <input type="checkbox"/>              |
| m. Difficulty in arranging any mode of transport to the hospital or clinic.                                                                                                                        | <input type="checkbox"/>                 | <input type="checkbox"/>    | <input type="checkbox"/>   | <input type="checkbox"/> | <input type="checkbox"/>              |
| n. Too busy to make time to go to the doctor.                                                                                                                                                      | <input type="checkbox"/>                 | <input type="checkbox"/>    | <input type="checkbox"/>   | <input type="checkbox"/> | <input type="checkbox"/>              |
| o. Too many other things to worry about.                                                                                                                                                           | <input type="checkbox"/>                 | <input type="checkbox"/>    | <input type="checkbox"/>   | <input type="checkbox"/> | <input type="checkbox"/>              |

SECTION 1

**SUBSECTION 3: BREAST SYMPTOMS**

**Q13.** Pick ONE (1) option only. How did you **FIRST** notice your cancer symptoms?

<sub>1</sub> Symptoms detected / picked up by doctor. **(OPTION A)**

<sub>2</sub> Symptoms detected through health promotional activities / health screening. **(OPTION B)**

<sub>3</sub> Symptoms detected by me. **(OPTION C)**

<sub>4</sub> Symptoms detected by family members / friends. **(OPTION C)**

SECTION 1

**SUBSECTION 3: BREAST SYMPTOMS (CONTINUED)**

**OPTION A**

“Symptoms detected / picked up by the doctor.”

**Q13.1. What were the reason(s) you saw that doctor for?**

---

**Q13.2. When did you see this doctor?**

\_\_\_ \_\_\_ / \_\_\_ \_\_\_ / \_\_\_ \_\_\_ \_\_\_ \_\_\_ (DD/MM/YYYY)

*If you cannot remember the exact date(s), please fill in the month and year*

**Q13.3. Where did you visit this doctor?**

1 Private Clinic

5 University Clinic

2 Private Hospital

6 University Hospital

3 Government Health Clinic

7 Traditional and Complementary Medicine

4 Government Hospital

8 Health Screening Centre (e.g. BP Healthcare, Gribbles)

99 Others, please specify: \_\_\_\_\_

**Q13.4. Did this doctor refer you to a specialist / hospital for further investigation of your cancer symptom(s)?**

0 No

1 Yes

**Q13.5a. Which of the following symptom(s) were detected by this doctor?**

*Please TICK (✓) all the relevant boxes.*

1 Breast lump

5 Swollen lumps in the armpit

2 Nipple problems

6 Unintentional weight loss

3 Breast pain

7 Loss of appetite

4 Changes of breast shape

99 Others, please specify: \_\_\_\_\_

**Q13.5b. When you were told about the above symptom(s), what were your thoughts?**

1 I may have cancer. I need to get myself checked.

2 It is not cancer. The symptom appeared because of something else.

3 I thought it was not serious. The problem or symptom will go away soon.

99 Others, please specify: \_\_\_\_\_

SECTION 1

**SUBSECTION 3: BREAST SYMPTOMS (CONTINUED)**

**Q13.6. Prior to visiting the above doctor, did you visit any other doctor for the above-mentioned symptom(s) (Q13.5a)?**

<sub>0</sub> No

<sub>1</sub> Yes, **when was it?** \_\_\_\_ / \_\_\_\_ / \_\_\_\_ (DD/MM/YYYY)

*If you cannot remember the exact date(s), please fill in the month and year*

**Q13.7. Prior to visiting the above doctor, have you ever experienced any of the above-mentioned symptom(s) (Q13.5a)?**

<sub>0</sub> No

<sub>1</sub> Yes, **when was the first symptom experienced?** \_\_\_\_ / \_\_\_\_ / \_\_\_\_

*If you cannot remember the exact date(s), please fill in the month and year. (DD/MM/YYYY)*

## SECTION 1

## SUBSECTION 3: BREAST SYMPTOMS (CONTINUED)

## OPTION B

"Symptoms detected through health promotional activities / health screening."

## Q13.1. When was this health promotional activity?

\_\_\_ \_\_\_ / \_\_\_ \_\_\_ / \_\_\_ \_\_\_ \_\_\_ \_\_\_ (DD/MM/YYYY)

*If you cannot remember the exact date(s), please fill in the month and year*

## Q13.2. Where did you visit this health promotional activity?

1 Private Clinic

5 University Clinic

2 Private Hospital

6 University Hospital

3 Government Health Clinic

7 Traditional and Complementary Medicine

4 Government Hospital

8 Health Screening Centre (e.g. BP Healthcare, Gribbles)

99 Others, please specify: \_\_\_\_\_

Q13.3. Did this doctor refer you to a specialist / hospital for further investigation of your cancer symptom(s)?

0 No

1 Yes

## Q13.4a. Which of the following symptom(s) were detected during this health promotional activity?

*Please TICK (✓) all the relevant boxes.*

1 Breast lump

5 Swollen lumps in the armpit

2 Nipple problems

6 Unintentional weight loss

3 Breast pain

7 Loss of appetite

4 Changes of breast shape

99 Others, please specify: \_\_\_\_\_

## Q13.4b. When you were told about the above symptom(s), what were your thoughts?

1 I may have cancer. I need to get myself checked.

2 It is not cancer. The symptom appeared because of something else.

3 I thought it was not serious. The problem or symptom will go away soon.

99 Others, please specify: \_\_\_\_\_

## Q13.5. Prior to attending the screening program above, have you ever experienced any of the above-mentioned symptom(s) (Q13.4a)?

0 No

1 Yes, when was the first symptom experienced? \_\_\_ \_\_\_ / \_\_\_ \_\_\_ / \_\_\_ \_\_\_ \_\_\_ \_\_\_

*If you cannot remember the exact date(s), please fill in the month and year. (DD/MM/YYYY)*

SECTION 1

**SUBSECTION 3: BREAST SYMPTOMS (CONTINUED)**

**OPTION C**

“Symptoms detected by me, family member or friends.”

**Q13.1. When did you see a doctor?**

\_\_\_\_ / \_\_\_\_ / \_\_\_\_\_ (DD/MM/YYYY)

*If you cannot remember the exact date(s), please fill in the month and year*

**Q13.2. Where did you visit this doctor?**

- |                                                                      |                                                                                              |
|----------------------------------------------------------------------|----------------------------------------------------------------------------------------------|
| <input type="checkbox"/> <sub>1</sub> Private Clinic                 | <input type="checkbox"/> <sub>5</sub> University Clinic                                      |
| <input type="checkbox"/> <sub>2</sub> Private Hospital               | <input type="checkbox"/> <sub>6</sub> University Hospital                                    |
| <input type="checkbox"/> <sub>3</sub> Government Health Clinic       | <input type="checkbox"/> <sub>7</sub> Traditional and Complementary Medicine                 |
| <input type="checkbox"/> <sub>4</sub> Government Hospital            | <input type="checkbox"/> <sub>8</sub> Health Screening Centre (e.g. BP Healthcare, Gribbles) |
| <input type="checkbox"/> <sub>99</sub> Others, please specify: _____ |                                                                                              |

**Q13.3. Did this doctor refer you to a specialist / hospital for further investigation of your cancer symptom(s)?**

- <sub>0</sub> No
- <sub>1</sub> Yes

**Q13.4a. Which of the following symptom(s) did you experience?**

*Please TICK (✓) the relevant boxes and provide the date that you noticed it.*

**DATE (DD/MM/YYYY)**

*If you cannot remember the exact date(s), please fill in the month and year.*

|                               |                          |  |
|-------------------------------|--------------------------|--|
| Breast lump                   | <input type="checkbox"/> |  |
| Nipple problems               | <input type="checkbox"/> |  |
| Breast pain                   | <input type="checkbox"/> |  |
| Changes of breast shape       | <input type="checkbox"/> |  |
| Swollen lumps in the armpit   | <input type="checkbox"/> |  |
| Unintentional weight loss     | <input type="checkbox"/> |  |
| Loss of appetite              | <input type="checkbox"/> |  |
| Others, please specify: _____ |                          |  |



SECTION 1

**SUBSECTION 3: BREAST SYMPTOMS (CONTINUED)**

**Q13.4b. When you experienced the above symptom(s), what were your thoughts?**

<sub>1</sub> I may have cancer. I need to get myself checked.

<sub>2</sub> It is not cancer. The symptom appeared because of something else.

<sub>3</sub> I thought it was not serious. The problem or symptom will go away soon.

<sub>99</sub> Others, please specify: \_\_\_\_\_

## SECTION 1

## SUBSECTION 3: BREAST SYMPTOMS (CONTINUED)

**Q14. Who was the first person you talked to about your cancer symptom(s)?**

- <sub>1</sub> I kept to myself
- <sub>2</sub> Partner / Husband / Wife
- <sub>3</sub> Other family members
- <sub>4</sub> Friends
- <sub>99</sub> Others, please specify: \_\_\_\_\_

**Q15. What did the person offer you?**

*Please TICK (✓) all the relevant boxes.*

- <sub>0</sub> I kept to myself.
- <sub>1</sub> Reassurance with words of advice and comfort to ease the worry.
- <sub>2</sub> Recommended some alternative medicine (e.g. Supplements).
- <sub>3</sub> Suggested for proactive measure such as further medical check-up.
- <sub>99</sub> Others, please specify: \_\_\_\_\_

**Q16. Do you have other matter(s) withholding you from getting subsequent cancer check-up / treatment?**

*Please TICK (✓) all the relevant boxes.*

- <sub>0</sub> NONE
- <sub>1</sub> Take care of young children
- <sub>2</sub> Take care of the elderly
- <sub>3</sub> Work related
- <sub>4</sub> Disability due to existing illness
- <sub>99</sub> Others, please specify: \_\_\_\_\_

**Q17. Did you see any other doctors for additional opinion for your cancer symptom(s)?**

- <sub>0</sub> No
- <sub>1</sub> Yes, **how many other doctors?** \_\_\_\_\_

SECTION 1

**SUBSECTION 4: CANCER JOURNEY (B: DIAGNOSIS)**

**Q18. When was your cancer diagnosis first confirmed by a doctor?**

*If you cannot remember the exact date(s), please fill in the month and year*

|                      |                      |   |                      |                      |   |                      |                      |                      |                      |
|----------------------|----------------------|---|----------------------|----------------------|---|----------------------|----------------------|----------------------|----------------------|
| <input type="text"/> | <input type="text"/> | / | <input type="text"/> | <input type="text"/> | / | <input type="text"/> | <input type="text"/> | <input type="text"/> | <input type="text"/> |
|----------------------|----------------------|---|----------------------|----------------------|---|----------------------|----------------------|----------------------|----------------------|

(DD/MM/YYYY)

**Q19. Where did you visit this doctor?**

- <sub>1</sub> Private Clinic
- <sub>2</sub> Private Hospital
- <sub>3</sub> Government Health Clinic
- <sub>4</sub> Government Hospital
- <sub>5</sub> University Clinic
- <sub>6</sub> University Hospital
- <sub>7</sub> Health Screening Centre (e.g. BP Healthcare, Gribbles)
- <sub>8</sub> Traditional and Complementary Medicine
- <sub>99</sub> Others, please specify: \_\_\_\_\_

**Q20. Did this doctor refer you to a specialist / hospital for cancer treatment?**

- <sub>0</sub> No
- <sub>1</sub> Yes

**Q21. Did you see any other doctors for additional opinion for your cancer diagnosis?**

- <sub>0</sub> No
- <sub>1</sub> Yes, how many other doctors? \_\_\_\_\_

**Q22. Who was the first person you talked to about your cancer diagnosis?**

- <sub>1</sub> I kept to myself
- <sub>2</sub> Partner / Husband / Wife
- <sub>3</sub> Other family members
- <sub>4</sub> Friends
- <sub>99</sub> Others, please specify: \_\_\_\_\_

SECTION 1

**SUBSECTION 4: CANCER JOURNEY (C: TREATMENT)**

**Q23. Who helped you make the final decision for your cancer treatment?**

- <sub>1</sub> Myself
- <sub>2</sub> Partner / Husband / Wife
- <sub>3</sub> Other family members
- <sub>4</sub> Friends
- <sub>99</sub> Others, please specify: \_\_\_\_\_

**Q24. Who usually pays for your medical expenses for cancer?**

*Please TICK (✓) all the relevant boxes.*

- <sub>1</sub> Self / Family members
- <sub>2</sub> Personal health insurance
- <sub>3</sub> Employer provided health insurance
- <sub>4</sub> Employer / Panel clinic (paid by employer)
- <sub>5</sub> Government / Pensioner
- <sub>99</sub> Others, please specify: \_\_\_\_\_

**Q25. Who normally accompanies you to see your healthcare provider during your cancer journey?**

*Please TICK (✓) all the relevant boxes.*

- <sub>1</sub> I go on my own
- <sub>2</sub> Partner / husband / wife
- <sub>3</sub> Other family members
- <sub>4</sub> Friends
- <sub>99</sub> Others, please specify: \_\_\_\_\_

**Q26. Did you see any other doctors for additional opinion for your cancer treatment?**

- <sub>0</sub> No
- <sub>1</sub> Yes, how many other doctors? \_\_\_\_\_

**Q27. Have you ever missed any cancer treatment?**

- <sub>0</sub> No
- <sub>1</sub> Yes

## SECTION 1

## SUBSECTION 5: TRADITIONAL AND COMPLEMENTARY MEDICINE (T&amp;CM)

**Q28. Which of the following did you use after your cancer diagnosis was confirmed by a doctor?**

Please TICK (✓) all the relevant boxes.

- <sub>1</sub> Malay herbs
- <sub>2</sub> Malay cupping
- <sub>3</sub> Malay massage
- <sub>4</sub> Acupuncture or Moxibustion
- <sub>5</sub> Chinese herbs
- <sub>6</sub> Tuina
- <sub>7</sub> Chinese cupping
- <sub>8</sub> Qi Gong
- <sub>9</sub> Ayurveda
- <sub>10</sub> Siddha
- <sub>11</sub> Unani
- <sub>12</sub> Yoga or Naturopathy
- <sub>13</sub> Homeopathy
- <sub>14</sub> Islamic Medical Practice
- <sub>15</sub> Mind – body Medicine Therapy (e.g. Hypnotherapy, Psychotherapy)
- <sub>16</sub> Biological based therapy (e.g. Aromatherapy, Nutritional Therapy)
- <sub>17</sub> Manipulative therapy (e.g. Chiropractic, osteopathy, reflexology, Thai massage, Swedish massage, Balinese/Javanese massage, shiatsu massage and aromatherapy massage)
- <sub>18</sub> Energy medicine (e.g. Reiki, aura metaphysic, colour vibration therapy)
- <sub>99</sub> Others, please specify: \_\_\_\_\_
- <sub>0</sub> Never tried any of the above. (If you pick this, please ignore subsequent questions.)

**a. Who recommended the above options to you?**

Please TICK (✓) all the relevant boxes.

- <sub>1</sub> No one
- <sub>2</sub> Family members
- <sub>3</sub> Friends
- <sub>99</sub> Others, please specify: \_\_\_\_\_
- <sub>4</sub> Medical staffs
- <sub>5</sub> Other cancer patients

## SUBSECTION 5: TRADITIONAL AND COMPLEMENTARY MEDICINE (T&amp;CM) (CONTINUED)

**b. What made you use the above options?***Please TICK (✓) all the relevant boxes.*

- <sub>1</sub> Could not afford conventional treatment. (e.g. surgery, radiotherapy, drugs / chemotherapy)
- <sub>2</sub> Attracted to the advertisement.  
(e.g. newspapers, magazine, flyers, social media, radio & TV announcement, etc)
- <sub>3</sub> Believe in its effectiveness to cure with less side effects.
- <sub>4</sub> Believe it can relieve my pain.
- <sub>5</sub> Believe it can treat the side effects of conventional treatment.  
(e.g. radiotherapy, drugs / chemotherapy)
- <sub>6</sub> Allow me to have more control over my illness than conventional medicine.
- <sub>7</sub> To make sure I receive all available treatment options.
- <sub>8</sub> It gives me positive hopes and peace of mind.
- <sub>9</sub> Unsure of its effect in treating cancer, so wanted to give it a try.
- <sub>99</sub> Others, please specify: \_\_\_\_\_

**c. How much roughly have you spent in a month for traditional and complimentary medicine?**

- <sub>1</sub> RM0 – RM99
- <sub>2</sub> RM100 – RM499
- <sub>3</sub> RM500 – RM1000
- <sub>4</sub> RM1001 – RM5000
- <sub>5</sub> RM5001 and above

**d. Did you inform your doctors about the usage of the above option(s)?**

- <sub>1</sub> Yes
- <sub>0</sub> No, **why?** *Please TICK (✓) all the relevant boxes.*
- <sub>1</sub> The doctor will not understand why I am using it.
- <sub>2</sub> The doctor did not ask me about it.
- <sub>3</sub> I am unsure of the doctor's reaction.
- <sub>4</sub> I have not seen my doctor yet.
- <sub>5</sub> I am afraid to tell the doctor.

SECTION 1

**SUBSECTION 5: TRADITIONAL AND COMPLEMENTARY MEDICINE (T&CM) (CONTINUED)**

e. Do you think the above options helped in treating your cancer?

0 No

1 Yes

**~~~THANK YOU FOR YOUR PARTICIPATION~~~**

## SECTION 2

## SUBSECTION 1: DEMOGRAPHIC

|                                                                               |                                                                                                                                                                                                 |
|-------------------------------------------------------------------------------|-------------------------------------------------------------------------------------------------------------------------------------------------------------------------------------------------|
| Q1. Date of Birth                                                             | <input type="text"/> <input type="text"/> / <input type="text"/> <input type="text"/> / <input type="text"/> <input type="text"/> <input type="text"/> <input type="text"/><br>(DD / MM / YYYY) |
| Q2. Postcode?                                                                 | <input type="text"/> <input type="text"/> <input type="text"/> <input type="text"/> <input type="text"/>                                                                                        |
| Q3. Gender?                                                                   | <input type="checkbox"/> <sub>1</sub> Male<br><input type="checkbox"/> <sub>2</sub> Female                                                                                                      |
| Q3a. Documented first (1 <sup>st</sup> ) symptom experienced date or duration | <input type="checkbox"/> <sub>1</sub> DATE of 1 <sup>st</sup> symptom experienced: ____ / ____ / ____<br>OR<br><input type="checkbox"/> <sub>2</sub> Duration : _____                           |

## SUBSECTION 2: DETAILS OF DIAGNOSIS

***BIOPSY RESULTS (PRE – SURGERY)***

|                                                                            |                                                                                                                                                                                                 |
|----------------------------------------------------------------------------|-------------------------------------------------------------------------------------------------------------------------------------------------------------------------------------------------|
| Q4.1. Date of <u>Biopsy / Cytology</u> Specimen taken                      | <input type="text"/> <input type="text"/> / <input type="text"/> <input type="text"/> / <input type="text"/> <input type="text"/> <input type="text"/> <input type="text"/><br>(DD / MM / YYYY) |
| Q4.2. Date of <u>Biopsy / Cytology</u> Specimen Receipt by the Pathologist | <input type="text"/> <input type="text"/> / <input type="text"/> <input type="text"/> / <input type="text"/> <input type="text"/> <input type="text"/> <input type="text"/><br>(DD / MM / YYYY) |
| Q4.3. Date of <u>Biopsy / Cytology</u> Pathology Report                    | <input type="text"/> <input type="text"/> / <input type="text"/> <input type="text"/> / <input type="text"/> <input type="text"/> <input type="text"/> <input type="text"/><br>(DD / MM / YYYY) |
| Q4.4 <u>Biopsy / Cytology</u> Diagnosis                                    |                                                                                                                                                                                                 |
| Q4.5 Date of Patient informed of <u>Biopsy / Cytology</u> Diagnosis        | <input type="text"/> <input type="text"/> / <input type="text"/> <input type="text"/> / <input type="text"/> <input type="text"/> <input type="text"/> <input type="text"/><br>(DD / MM / YYYY) |



SECTION 2

**SUBSECTION 2: DETAILS OF DIAGNOSIS**

**SOLID ORGAN RESULTS (POST SURGERY)**

|                                                        |                                                                                                                                                                                                 |
|--------------------------------------------------------|-------------------------------------------------------------------------------------------------------------------------------------------------------------------------------------------------|
| <b>Q5.1. Date of <u>Solid Organ</u> Specimen taken</b> | <input type="text"/> <input type="text"/> / <input type="text"/> <input type="text"/> / <input type="text"/> <input type="text"/> <input type="text"/> <input type="text"/><br>(DD / MM / YYYY) |
|--------------------------------------------------------|-------------------------------------------------------------------------------------------------------------------------------------------------------------------------------------------------|

|                                                                             |                                                                                                                                                                                                 |
|-----------------------------------------------------------------------------|-------------------------------------------------------------------------------------------------------------------------------------------------------------------------------------------------|
| <b>Q5.2. Date of <u>Solid Organ</u> Specimen Receipt by the Pathologist</b> | <input type="text"/> <input type="text"/> / <input type="text"/> <input type="text"/> / <input type="text"/> <input type="text"/> <input type="text"/> <input type="text"/><br>(DD / MM / YYYY) |
|-----------------------------------------------------------------------------|-------------------------------------------------------------------------------------------------------------------------------------------------------------------------------------------------|

|                                                          |                                                                                                                                                                                                 |
|----------------------------------------------------------|-------------------------------------------------------------------------------------------------------------------------------------------------------------------------------------------------|
| <b>Q5.3. Date of <u>Solid Organ</u> Pathology Report</b> | <input type="text"/> <input type="text"/> / <input type="text"/> <input type="text"/> / <input type="text"/> <input type="text"/> <input type="text"/> <input type="text"/><br>(DD / MM / YYYY) |
|----------------------------------------------------------|-------------------------------------------------------------------------------------------------------------------------------------------------------------------------------------------------|

|                                                |  |
|------------------------------------------------|--|
| <b>Q5.4 Final <u>Solid Organ</u> Diagnosis</b> |  |
|------------------------------------------------|--|

|                                                                      |                                                                                                                                                                                                 |
|----------------------------------------------------------------------|-------------------------------------------------------------------------------------------------------------------------------------------------------------------------------------------------|
| <b>Q5.5 Date of Patient informed of <u>Solid Organ</u> Diagnosis</b> | <input type="text"/> <input type="text"/> / <input type="text"/> <input type="text"/> / <input type="text"/> <input type="text"/> <input type="text"/> <input type="text"/><br>(DD / MM / YYYY) |
|----------------------------------------------------------------------|-------------------------------------------------------------------------------------------------------------------------------------------------------------------------------------------------|

**Q6. PATHOLOGICAL STAGING (Fill all that is available)**

|                       |                                                                                                                                                                                                      |
|-----------------------|------------------------------------------------------------------------------------------------------------------------------------------------------------------------------------------------------|
| <b>CANCER STAGING</b> | <input type="checkbox"/> <sub>1</sub> Stage I<br><input type="checkbox"/> <sub>2</sub> Stage II<br><input type="checkbox"/> <sub>3</sub> Stage III<br><input type="checkbox"/> <sub>4</sub> Stage IV |
|-----------------------|------------------------------------------------------------------------------------------------------------------------------------------------------------------------------------------------------|

|                       |  |                                               |  |
|-----------------------|--|-----------------------------------------------|--|
| <b>TUMOUR (T)</b>     |  | <b>FIGO Staging</b><br><i>(If Cervical)</i>   |  |
| <b>NODES (N)</b>      |  | <b>Duke Staging</b><br><i>(If Colorectal)</i> |  |
| <b>METASTASIS (M)</b> |  |                                               |  |

SECTION 2

**SUBSECTION 3: DETAILS OF TREATMENT**

|                                                             |                                                                                                                                                                                                                                                                                                                                                                                                                                                                                                                                                                                                                                                                             |
|-------------------------------------------------------------|-----------------------------------------------------------------------------------------------------------------------------------------------------------------------------------------------------------------------------------------------------------------------------------------------------------------------------------------------------------------------------------------------------------------------------------------------------------------------------------------------------------------------------------------------------------------------------------------------------------------------------------------------------------------------------|
| <b>Q7. Date of First(1<sup>st</sup>) Treatment Received</b> | <input style="width: 30px; height: 30px; border: 1px solid black;" type="text"/> <input style="width: 30px; height: 30px; border: 1px solid black;" type="text"/> / <input style="width: 30px; height: 30px; border: 1px solid black;" type="text"/> <input style="width: 30px; height: 30px; border: 1px solid black;" type="text"/> / <input style="width: 30px; height: 30px; border: 1px solid black;" type="text"/> <input style="width: 30px; height: 30px; border: 1px solid black;" type="text"/> <input style="width: 30px; height: 30px; border: 1px solid black;" type="text"/> <input style="width: 30px; height: 30px; border: 1px solid black;" type="text"/> |
|                                                             | (DD / MM / YYYY)                                                                                                                                                                                                                                                                                                                                                                                                                                                                                                                                                                                                                                                            |

|                                                                                                                                                                                                                                                            |                                                                                                                                                                                                                                                                                                                                                                                                                                                                                                                                                                                                                                                                                                                                                                                                                                                                                                                                                                                                                                                                                                                                                                                                                                                                                                                                                                                          |                                             |           |                           |                          |                |                           |                          |                |                           |                          |                    |                           |                          |                    |                           |                          |                        |                           |                          |                   |                           |                          |             |                                             |                          |                    |                           |
|------------------------------------------------------------------------------------------------------------------------------------------------------------------------------------------------------------------------------------------------------------|------------------------------------------------------------------------------------------------------------------------------------------------------------------------------------------------------------------------------------------------------------------------------------------------------------------------------------------------------------------------------------------------------------------------------------------------------------------------------------------------------------------------------------------------------------------------------------------------------------------------------------------------------------------------------------------------------------------------------------------------------------------------------------------------------------------------------------------------------------------------------------------------------------------------------------------------------------------------------------------------------------------------------------------------------------------------------------------------------------------------------------------------------------------------------------------------------------------------------------------------------------------------------------------------------------------------------------------------------------------------------------------|---------------------------------------------|-----------|---------------------------|--------------------------|----------------|---------------------------|--------------------------|----------------|---------------------------|--------------------------|--------------------|---------------------------|--------------------------|--------------------|---------------------------|--------------------------|------------------------|---------------------------|--------------------------|-------------------|---------------------------|--------------------------|-------------|---------------------------------------------|--------------------------|--------------------|---------------------------|
| <b>Q8. Type of Treatments Option Given and Date of First(1<sup>st</sup>) Treatment Received</b><br><i>(*Please choose all relevant Treatments received (Multiple Choice))</i><br><br><i>(*Please Enter the Following format for dates: DD / MM / YYYY)</i> | <table style="width: 100%; border-collapse: collapse;"> <tr> <td style="width: 5%; text-align: center;"><input type="checkbox"/></td> <td style="width: 45%;">1 Surgery</td> <td style="width: 50%;">date: ____ / ____ / _____</td> </tr> <tr> <td style="text-align: center;"><input type="checkbox"/></td> <td>2 Radiotherapy</td> <td>date: ____ / ____ / _____</td> </tr> <tr> <td style="text-align: center;"><input type="checkbox"/></td> <td>3 Chemotherapy</td> <td>date: ____ / ____ / _____</td> </tr> <tr> <td style="text-align: center;"><input type="checkbox"/></td> <td>4 Hormonal Therapy</td> <td>date: ____ / ____ / _____</td> </tr> <tr> <td style="text-align: center;"><input type="checkbox"/></td> <td>5 Targeted Therapy</td> <td>date: ____ / ____ / _____</td> </tr> <tr> <td style="text-align: center;"><input type="checkbox"/></td> <td>6 Neo-Adjuvant Therapy</td> <td>date: ____ / ____ / _____</td> </tr> <tr> <td style="text-align: center;"><input type="checkbox"/></td> <td>7 Palliative Care</td> <td>date: ____ / ____ / _____</td> </tr> <tr> <td style="text-align: center;"><input type="checkbox"/></td> <td>8 Pregnancy</td> <td>EDD / actual birthdate: ____ / ____ / _____</td> </tr> <tr> <td style="text-align: center;"><input type="checkbox"/></td> <td>0 Refuse Treatment</td> <td>date: ____ / ____ / _____</td> </tr> </table> | <input type="checkbox"/>                    | 1 Surgery | date: ____ / ____ / _____ | <input type="checkbox"/> | 2 Radiotherapy | date: ____ / ____ / _____ | <input type="checkbox"/> | 3 Chemotherapy | date: ____ / ____ / _____ | <input type="checkbox"/> | 4 Hormonal Therapy | date: ____ / ____ / _____ | <input type="checkbox"/> | 5 Targeted Therapy | date: ____ / ____ / _____ | <input type="checkbox"/> | 6 Neo-Adjuvant Therapy | date: ____ / ____ / _____ | <input type="checkbox"/> | 7 Palliative Care | date: ____ / ____ / _____ | <input type="checkbox"/> | 8 Pregnancy | EDD / actual birthdate: ____ / ____ / _____ | <input type="checkbox"/> | 0 Refuse Treatment | date: ____ / ____ / _____ |
| <input type="checkbox"/>                                                                                                                                                                                                                                   | 1 Surgery                                                                                                                                                                                                                                                                                                                                                                                                                                                                                                                                                                                                                                                                                                                                                                                                                                                                                                                                                                                                                                                                                                                                                                                                                                                                                                                                                                                | date: ____ / ____ / _____                   |           |                           |                          |                |                           |                          |                |                           |                          |                    |                           |                          |                    |                           |                          |                        |                           |                          |                   |                           |                          |             |                                             |                          |                    |                           |
| <input type="checkbox"/>                                                                                                                                                                                                                                   | 2 Radiotherapy                                                                                                                                                                                                                                                                                                                                                                                                                                                                                                                                                                                                                                                                                                                                                                                                                                                                                                                                                                                                                                                                                                                                                                                                                                                                                                                                                                           | date: ____ / ____ / _____                   |           |                           |                          |                |                           |                          |                |                           |                          |                    |                           |                          |                    |                           |                          |                        |                           |                          |                   |                           |                          |             |                                             |                          |                    |                           |
| <input type="checkbox"/>                                                                                                                                                                                                                                   | 3 Chemotherapy                                                                                                                                                                                                                                                                                                                                                                                                                                                                                                                                                                                                                                                                                                                                                                                                                                                                                                                                                                                                                                                                                                                                                                                                                                                                                                                                                                           | date: ____ / ____ / _____                   |           |                           |                          |                |                           |                          |                |                           |                          |                    |                           |                          |                    |                           |                          |                        |                           |                          |                   |                           |                          |             |                                             |                          |                    |                           |
| <input type="checkbox"/>                                                                                                                                                                                                                                   | 4 Hormonal Therapy                                                                                                                                                                                                                                                                                                                                                                                                                                                                                                                                                                                                                                                                                                                                                                                                                                                                                                                                                                                                                                                                                                                                                                                                                                                                                                                                                                       | date: ____ / ____ / _____                   |           |                           |                          |                |                           |                          |                |                           |                          |                    |                           |                          |                    |                           |                          |                        |                           |                          |                   |                           |                          |             |                                             |                          |                    |                           |
| <input type="checkbox"/>                                                                                                                                                                                                                                   | 5 Targeted Therapy                                                                                                                                                                                                                                                                                                                                                                                                                                                                                                                                                                                                                                                                                                                                                                                                                                                                                                                                                                                                                                                                                                                                                                                                                                                                                                                                                                       | date: ____ / ____ / _____                   |           |                           |                          |                |                           |                          |                |                           |                          |                    |                           |                          |                    |                           |                          |                        |                           |                          |                   |                           |                          |             |                                             |                          |                    |                           |
| <input type="checkbox"/>                                                                                                                                                                                                                                   | 6 Neo-Adjuvant Therapy                                                                                                                                                                                                                                                                                                                                                                                                                                                                                                                                                                                                                                                                                                                                                                                                                                                                                                                                                                                                                                                                                                                                                                                                                                                                                                                                                                   | date: ____ / ____ / _____                   |           |                           |                          |                |                           |                          |                |                           |                          |                    |                           |                          |                    |                           |                          |                        |                           |                          |                   |                           |                          |             |                                             |                          |                    |                           |
| <input type="checkbox"/>                                                                                                                                                                                                                                   | 7 Palliative Care                                                                                                                                                                                                                                                                                                                                                                                                                                                                                                                                                                                                                                                                                                                                                                                                                                                                                                                                                                                                                                                                                                                                                                                                                                                                                                                                                                        | date: ____ / ____ / _____                   |           |                           |                          |                |                           |                          |                |                           |                          |                    |                           |                          |                    |                           |                          |                        |                           |                          |                   |                           |                          |             |                                             |                          |                    |                           |
| <input type="checkbox"/>                                                                                                                                                                                                                                   | 8 Pregnancy                                                                                                                                                                                                                                                                                                                                                                                                                                                                                                                                                                                                                                                                                                                                                                                                                                                                                                                                                                                                                                                                                                                                                                                                                                                                                                                                                                              | EDD / actual birthdate: ____ / ____ / _____ |           |                           |                          |                |                           |                          |                |                           |                          |                    |                           |                          |                    |                           |                          |                        |                           |                          |                   |                           |                          |             |                                             |                          |                    |                           |
| <input type="checkbox"/>                                                                                                                                                                                                                                   | 0 Refuse Treatment                                                                                                                                                                                                                                                                                                                                                                                                                                                                                                                                                                                                                                                                                                                                                                                                                                                                                                                                                                                                                                                                                                                                                                                                                                                                                                                                                                       | date: ____ / ____ / _____                   |           |                           |                          |                |                           |                          |                |                           |                          |                    |                           |                          |                    |                           |                          |                        |                           |                          |                   |                           |                          |             |                                             |                          |                    |                           |
